# Supplementary material
Source: HighWire-hosted journal article supplement (http://www.jrheum.org/highwire/filestream/34542/field_highwire_adjunct_files/0/180355DataSuppl.pdf)
Supplement: 180355DataSuppl.pdf [file 180355DataSuppl.pdf]

**Supplementary Data.** Association between clinical and serological features of patients with antisynthetase syndrome and nailfold capillaroscopy measures.

|                      |   | Capillaries,<br>mean<br>number/mm | p       | Giant<br>Capillaries,<br>% | p     | Giant<br>Capillaries,<br>mean<br>number/mm | p     | Micro-<br>hemorrhages,<br>% | p     | Avascular<br>Areas, % | p       | Ramified<br>Capillaries,<br>% | p    | SSc-like<br>Pattern,<br>% | p     |
|----------------------|---|-----------------------------------|---------|----------------------------|-------|--------------------------------------------|-------|-----------------------------|-------|-----------------------|---------|-------------------------------|------|---------------------------|-------|
| Female/male<br>ratio |   | 8.5/9                             | ns      | 32.7/27.9                  | ns    | 0.17/0.85                                  | ns    | 21.4/27.9                   | ns    | 21.4/14               | ns      | 49.1/53.5                     | ns   | 38.4/27.9                 | ns    |
| RP                   | ± | 8.4/8.8                           | ns      | 38.5/25.7                  | ns    | 0.16/0.13                                  | ns    | 24.2/21.1                   | ns    | 28.6/12.8             | 0.006   | 47.3/52.3                     | ns   | 40.7/32.1                 | ns    |
| Mechanic's<br>hands  | ± | 8.5/8.7                           | ns      | 37.5/27.1                  | ns    | 0.15/0.14                                  | ns    | 22.5/22                     | ns    | 23.8/16.9             | ns      | 57.5/44.9                     | ns   | 43.8/30.5                 | ns    |
| Arthritis            | ± | 8.6/8.7                           | ns      | 31.5/37                    | ns    | 0.16/0.13                                  | ns    | 20.8/30.4                   | ns    | 20.1/21.7             | ns      | 47/60.9                       | ns   | 35.6/39.1                 | ns    |
| Myositis             | ± | 8.9/7.7                           | ns      | 31/35.1                    | ns    | 0.14/0.19                                  | ns    | 22.2/24.3                   | ns    | 17.1/32.4             | 0.036   | 50.6/48.6                     | ns   | 34.8/43.2                 | ns    |
| ILD                  | ± | 8.5/9.4                           | ns      | 33.3/20.7                  | ns    | 0.14/0.17                                  | ns    | 23.6/17.2                   | ns    | 21.8/6.9              | ns      | 53.4/27.6                     | 0.01 | 37.9/24.1                 | ns    |
| ANA                  | ± | 8.5/9.1                           | ns      | 33.3/34.5                  | ns    | 0.17/0.09                                  | ns    | 25/19.1                     | ns    | 22.2/8.8              | ns      | 51.9/47.1                     | ns   | 38/29.4                   | ns    |
| Anti-SSA             | ± | 8.8/8.2                           | ns      | 36.7/25.8                  | ns    | 0.16/0.11                                  | ns    | 21.4/22.7                   | ns    | 27.6/13.4             | 0.014   | 55.1/46.4                     | ns   | 38.8/33                   | ns    |
| Anti-Jo1             | ± | 8.2/9.6                           | < 0.001 | 39.6/16.9                  | 0.001 | 0.18/0.07                                  | 0.001 | 27.6/13.8                   | 0.031 | 27.6/4.6              | < 0.001 | 53.7/44.6                     | ns   | 44/21.5                   | 0.002 |

RP: Raynaud phenomenon; ILD: interstitial lung disease; ANA: antinuclear antibodies; ns: not significant.
